# Supplementary material
Source: PubMed Central journal article supplement (PMC3169143)
Supplement: 1103810108_pnas.201103810SI.pdf [file 1103810108_pnas.201103810SI.pdf]

# Supporting Information

Cozzo Picca et al. 10.1073/pnas.1103810108

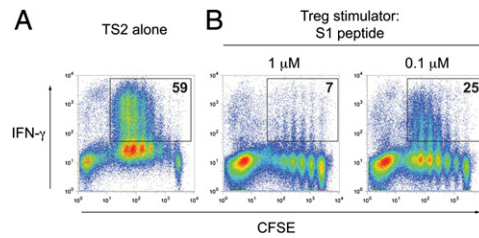

**Fig. S1.**  $6.5^{\text{hi}}\text{CD4}^+\text{CD25}^+$  T cells exhibit Treg cell function. Representative dot plots ( $n = 3$ ) showing IFN- $\gamma$  production by CFSE-labeled  $\text{CD4}^+$  LN cells from TS2 mice following in vitro culture with (A) S2 peptide only or (B) with S2 peptide,  $6.5^{\text{hi}}\text{CD4}^+\text{CD25}^+$  LN cells from TS1  $\times$  HA28 mice, and indicated amounts of S1 peptide. Percentages of IFN- $\gamma^+$  TS2 cells are indicated. Data are representative of three independent experiments.

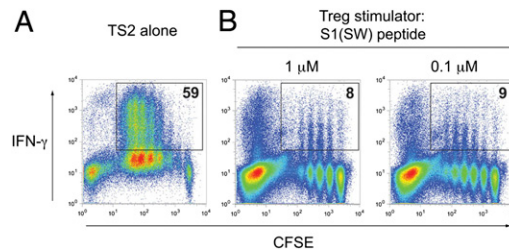

**Fig. S2.**  $\text{V}\alpha 8.3^+\text{V}\beta 10^+\text{CD4}^+\text{CD25}^+$  T cells exhibit Treg cell function. Representative dot plots ( $n = 3$ ) showing IFN- $\gamma$  production by CFSE-labeled  $\text{CD4}^+$  LN cells from TS2 mice following in vitro culture with (A) S2 peptide only or (B) with S2 peptide,  $\text{V}\alpha 8.3^+\text{V}\beta 10^+\text{CD4}^+\text{CD25}^+$  LN cells from TS1(SW)  $\times$  Pev(SW)HA mice, and indicated amounts of S1(SW) peptide. Percentages of IFN- $\gamma^+$  TS2 cells are indicated. Data are representative of three independent experiments.

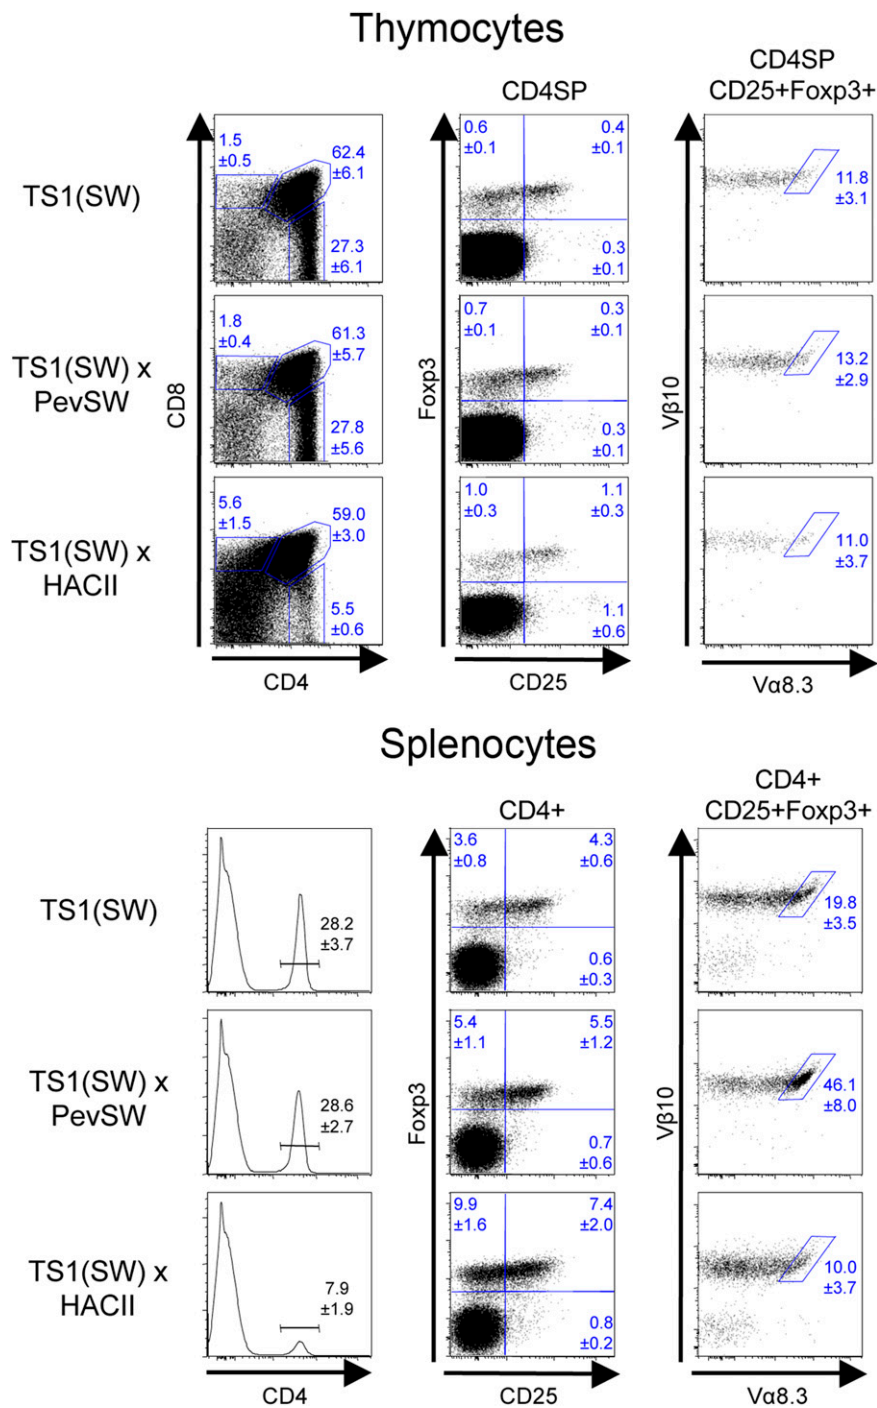

**Fig. S3.** Enhanced thymocyte deletion does not promote Va8.3<sup>+</sup> Treg cell formation in TS1(SW) × HACII mice. Representative dot plots show CD4 versus CD8 expression (*Left*), CD25 versus Foxp3 expression on CD4<sup>+</sup>CD8<sup>-</sup> events (*Center*), and Va8.3 versus Vβ10 expression on CD4<sup>+</sup>CD8<sup>-</sup>CD25<sup>+</sup>Foxp3<sup>+</sup> events (*Right*). Thymocytes (*Upper*) and splenocytes (*Lower*) from TS1(SW), TS1(SW) × Pev(SW)HA, and TS1(SW) × HACII mice. Mean percentages ± SEM in indicated gates are shown. *n* = 4–6 for each condition.

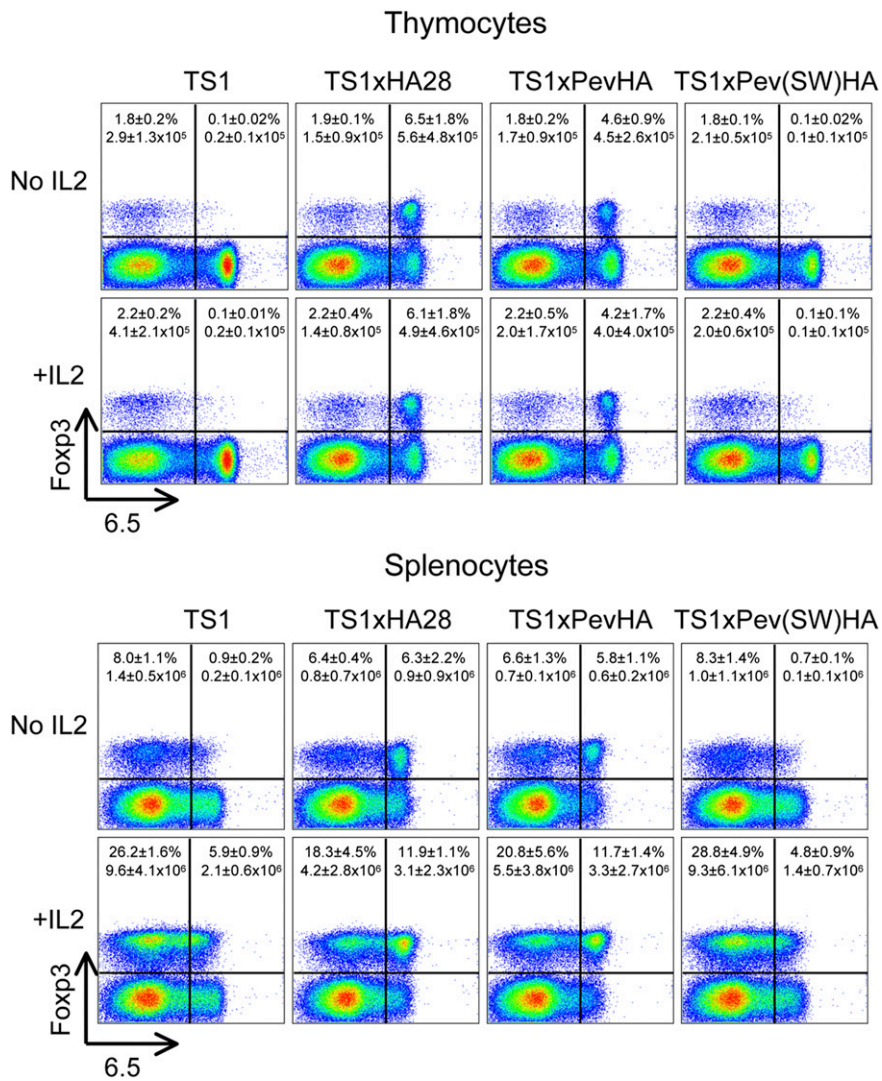

**Fig. S4.** Agonist-induced IL-2 production does not promote Treg cell formation in TS1 × HA28 and TS1 × PevHA mice. Representative dot plots ( $n = 3$ ) show Foxp3 versus 6.5 staining of CD4SP thymocytes (*Upper*) and of CD4<sup>+</sup> splenocytes (*Lower*) obtained from TS1, TS1 × HA28, TS1 × PevHA, and TS1 × Pev(SW)HA mice either without IL-2 treatment ("No IL2") or 5 d after injection of IL-2:anti-IL2 complexes ("+IL-2"). The percentages and numbers of cells ± SEM in the indicated quadrants are shown.
